# Supplementary material for: Novel dithioether–silver(i) coordination architectures: structural diversities by varying the spacers and terminal groups of ligands
Source: Royal Society of Chemistry journal article supplement (doi:10.1039/b416576b), 2005-01-01
Supplement: b416576b.doc [file b416576b.doc]

**Novel Dithioether-Silver(I) Coordination Architectures: Structural Diversities by Varying the Spacers and Terminal Groups of Ligands**

**Jian-Rong Li,****Xian-He Bu,*** **Jiao Jiao, Wen-Ping Du, Xiu-Hua Xu, and Ruo-Hua Zhang**

### Department of Chemistry, Nankai University, Tianjin 300071, P. R. China

**Experimental (EXP) and simulated (SIM) diffraction patterns**

The polycrystalline compounds were obtained by adding ether directly to the reaction systems, of which the reaction stoichiometric ratio being in agreement with the composition of the corresponding crystal structure.

The X-ray powder diffraction patterns (XRPD) ofall complexes were obtained with a Rigaku D/Max-2500 diffractometer, operated at 40 kV and 100 mA, using a Cu-target tube and a graphite monochromater. Fixed scatter and divergence slits of 1o and a 0.3 mm receiving slit were used. The intensity data were recorded by continuous scan in a 2*θ*/*θ* mode from 3o to 60o with a step size of 0.02o and a scan speed of 5o min–1. Simulation of the XRPD spectra was carried out by the single-crystal data and diffraction-crystal module of the commercially available Cerius2 program.(*Cerius2*, Molecular Simulation Incorporated, San Diego, CA 2001.)
